# Supplementary material
Source: ML conference proceedings conference paper supplement (https://proceedings.neurips.cc/paper_files/paper/2017/hash/f22e4747da1aa27e363d86d40ff442fe-Abstract.html)
Supplement: Supplementary file [file f22e4747da1aa27e363d86d40ff442fe-Supplemental.zip]

## Appendix: Deep Sets

### A Proofs and Discussion Related to Theorem 2

A function  $f$  transforms its domain  $\mathcal{X}$  into its range  $\mathcal{Y}$ . Usually, the input domain is a vector space  $\mathbb{R}^d$  and the output response range is either a discrete space, e.g.  $\{0, 1\}$  in case of classification, or a continuous space  $\mathbb{R}$  in case of regression.

Now, if the input is a set  $X = \{x_1, \dots, x_M\}, x_m \in \mathfrak{X}$ , i.e.  $\mathcal{X} = 2^{\mathfrak{X}}$ , then we would like the response of the function not to depend on the ordering of the elements in the set. In other words,

**Property 1** *A function  $f : 2^{\mathfrak{X}} \rightarrow \mathbb{R}$  acting on sets must be permutation invariant to the order of objects in the set, i.e.*

$$f(\{x_1, \dots, x_M\}) = f(\{x_{\pi(1)}, \dots, x_{\pi(M)}\}) \quad (7)$$

for any permutation  $\pi$ .

Now, roughly speaking, we claim that such functions must have a structure of the form  $f(X) = \rho(\sum_{x \in X} \phi(x))$  for some functions  $\rho$  and  $\phi$ . Over the next two sections we try to formally prove this structure of the permutation invariant functions.

#### A.1 Countable Case

**Theorem 2** *Assume the elements are countable, i.e.  $|\mathfrak{X}| < \aleph_0$ . A function  $f : 2^{\mathfrak{X}} \rightarrow \mathbb{R}$  operating on a set  $X$  can be a valid set function, i.e. it is permutation invariant to the elements in  $X$ , if and only if it can be decomposed in the form  $\rho(\sum_{x \in X} \phi(x))$ , for suitable transformations  $\phi$  and  $\rho$ .*

**Proof.** Permutation invariance follows from the fact that sets have no particular order, hence any function on a set must not exploit any particular order either. The sufficiency follows by observing that the function  $\rho(\sum_{x \in X} \phi(x))$  satisfies the permutation invariance condition.

To prove necessity, i.e. that all functions can be decomposed in this manner, we begin by noting that there must be a mapping from the elements to natural numbers functions, since the elements are countable. Let this mapping be denoted by  $c : \mathfrak{X} \rightarrow \mathbb{N}$ . Now if we let  $\phi(x) = 4^{-c(x)}$  then  $\sum_{x \in X} \phi(x)$  constitutes an unique representation for every set  $X \in 2^{\mathfrak{X}}$ . Now a function  $\rho : \mathbb{R} \rightarrow \mathbb{R}$  can always be constructed such that  $f(X) = \rho(\sum_{x \in X} \phi(x))$ . ■

#### A.2 Uncountable Case

The extension to case when  $\mathfrak{X}$  is uncountable, e.g.  $\mathfrak{X} = [0, 1]$ , is not so trivial. We could only prove in case of fixed set size, e.g.  $\mathcal{X} = [0, 1]^M$  instead of  $\mathcal{X} = 2^{\mathfrak{X}} = 2^{[0, 1]}$ , that any permutation invariant continuous function can be expressed as  $\rho(\sum_{x \in X} \phi(x))$ . Also, we show that there is a universal approximator of the same form. These results are discussed below.

To illustrate the uncountable case, we assume a fixed set size of  $M$ . Without loss of generality we can let  $\mathfrak{X} = [0, 1]$ . Then the domain becomes  $[0, 1]^M$ . Also, to handle ambiguity due to permutation, we often define the domain to be the set  $\mathcal{X} = \{(x_1, \dots, x_M) \in [0, 1]^M : x_1 \leq x_2 \leq \dots \leq x_M\}$  for some ordering of the elements in  $\mathfrak{X}$ .

The proof builds on the famous Newton-Girard formulae which connect moments of a sample set (sum-of-power) to the elementary symmetric polynomials. But first we present some results needed for the proof. The first result establishes that sum-of-power mapping is injective.

**Lemma 4** *Let  $\mathcal{X} = \{(x_1, \dots, x_M) \in [0, 1]^M : x_1 \leq x_2 \leq \dots \leq x_M\}$ . The sum-of-power mapping  $E : \mathcal{X} \rightarrow \mathbb{R}^{M+1}$  defined by the coordinate functions*

$$Z_q := E_q(X) := \sum_{m=1}^M (x_m)^q, \quad q = 0, \dots, M. \quad (8)$$

is injective.

**Proof.** Suppose for some  $u, v \in \mathcal{X}$ , we have  $E(u) = E(v)$ . We will now show that it must be the case that  $u = v$ . Construct two polynomials as follows:

$$P_u(x) = \prod_{m=1}^M (x - u_m) \quad P_v(x) = \prod_{m=1}^M (x - v_m) \quad (9)$$

If we expand the two polynomials we obtain:

$$\begin{aligned} P_u(x) &= x^M - a_1 x^{M-1} + \cdots (-1)^{M-1} a_{M-1} x + (-1)^M a_M \\ P_v(x) &= x^M - b_1 x^{M-1} + \cdots (-1)^{M-1} b_{M-1} x + (-1)^M b_M \end{aligned} \quad (10)$$

with coefficients being elementary symmetric polynomials in  $u$  and  $v$  respectively, i.e.

$$a_m = \sum_{1 \leq j_1 < j_2 < \cdots < j_m \leq M} u_{j_1} u_{j_2} \cdots u_{j_m} \quad b_m = \sum_{1 \leq j_1 < j_2 < \cdots < j_m \leq M} v_{j_1} v_{j_2} \cdots v_{j_m} \quad (11)$$

These elementary symmetric polynomials can be uniquely expressed as a function of  $E(u)$  and  $E(v)$  respectively, by Newton-Girard formula. The  $m$ -th coefficient is given by the determinant of  $m \times m$  matrix having terms from  $E(u)$  and  $E(v)$  respectively:

$$\begin{aligned} a_m &= \frac{1}{m} \det \begin{pmatrix} E_1(u) & 1 & 0 & 0 & \cdots & 0 \\ E_2(u) & E_1(u) & 1 & 0 & \cdots & 0 \\ E_3(u) & E_2(u) & E_1(u) & 1 & \cdots & 0 \\ \vdots & \vdots & \vdots & \vdots & \ddots & \vdots \\ E_{m-1}(u) & E_{m-2}(u) & E_{m-3}(u) & E_{m-4}(u) & \cdots & 1 \\ E_m(u) & E_{m-1}(u) & E_{m-2}(u) & E_{m-3}(u) & \cdots & E_1(u) \end{pmatrix} \\ b_m &= \frac{1}{m} \det \begin{pmatrix} E_1(v) & 1 & 0 & 0 & \cdots & 0 \\ E_2(v) & E_1(v) & 1 & 0 & \cdots & 0 \\ E_3(v) & E_2(v) & E_1(v) & 1 & \cdots & 0 \\ \vdots & \vdots & \vdots & \vdots & \ddots & \vdots \\ E_{m-1}(v) & E_{m-2}(v) & E_{m-3}(v) & E_{m-4}(v) & \cdots & 1 \\ E_m(v) & E_{m-1}(v) & E_{m-2}(v) & E_{m-3}(v) & \cdots & E_1(v) \end{pmatrix} \end{aligned} \quad (12)$$

Since we assumed  $E(u) = E(v)$  implying  $[a_1, \dots, a_M] = [b_1, \dots, b_M]$ , which in turn implies that the polynomials  $P_u$  and  $P_v$  are the same. Therefore, their roots must be the same, which shows that  $u = v$ . ■

The second result we borrow from [46] which establishes a homeomorphism between coefficients and roots of a polynomial.

**Theorem 5 [46]** *The function  $f : \mathbb{C}^M \rightarrow \mathbb{C}^M$ , which associates every  $a \in \mathbb{C}^M$  to the multiset of roots,  $f(a) \in \mathbb{C}^M$ , of the monic polynomial formed using  $a$  as the coefficient i.e.  $x^M + a_1 x^{M-1} + \cdots (-1)^{M-1} a_{M-1} x + (-1)^M a_M$ , is a homeomorphism.*

Among other things, this implies that (complex) roots of a polynomial depends continuously on the coefficients. We will use this fact for our next lemma.

Finally, we establish a continuous inverse mapping for the sum-of-power function.

**Lemma 6** *Let  $\mathcal{X} = \{(x_1, \dots, x_M) \in [0, 1]^M : x_1 \leq x_2 \leq \cdots \leq x_M\}$ . We define the sum-of-power mapping  $E : \mathcal{X} \rightarrow \mathcal{Z}$  by the coordinate functions*

$$Z_q := E_q(X) := \sum_{m=1}^M (x_m)^q, \quad q = 0, \dots, M. \quad (13)$$

where  $\mathcal{Z}$  is the range of the function. The function  $E$  has a continuous inverse mapping.

**Proof.** First of all note that  $\mathcal{Z}$ , the range of  $E$ , is a compact set. This follows from following observations:

- The domain of  $E$  is a bounded polytope (i.e. a compact set),
- $E$  is a continuous function, and
- image of a compact set under a continuous function is a compact set.

To show the continuity of inverse mapping, we establish connection to the continuous dependence of roots of polynomials on its coefficients.

As in Lemma 4, for any  $u \in \mathcal{X}$ , let  $z = E(u)$  and construct the polynomial:

$$P_u(x) = \prod_{m=1}^M (x - u_m) \quad (14)$$

If we expand the polynomial we obtain:

$$P_u(x) = x^M - a_1 x^{M-1} + \dots (-1)^{M-1} a_{M-1} x + (-1)^M a_M \quad (15)$$

with coefficients being elementary symmetric polynomials in  $u$ , *i.e.*

$$a_m = \sum_{1 \leq j_1 < j_2 < \dots < j_m \leq M} u_{j_1} u_{j_2} \dots u_{j_m} \quad (16)$$

These elementary symmetric polynomials can be uniquely expressed as a function of  $z$  by Newton-Girard formula:

$$a_m = \frac{1}{m} \det \begin{pmatrix} z_1 & 1 & 0 & 0 & \dots & 0 \\ z_2 & z_1 & 1 & 0 & \dots & 0 \\ z_3 & z_2 & z_1 & 1 & \dots & 0 \\ \vdots & \vdots & \vdots & \vdots & \ddots & \vdots \\ z_{m-1} & z_{m-2} & z_{m-3} & z_{m-4} & \dots & 1 \\ z_m & z_{m-1} & z_{m-2} & z_{m-3} & \dots & z_1 \end{pmatrix} \quad (17)$$

Since determinants are just polynomials,  $a$  is a continuous function of  $z$ . Thus to show continuity of inverse mapping of  $E$ , it remains to show continuity from  $a$  back to the roots  $u$ . In this regard, we invoke Theorem 5. Note that homeomorphism implies the mapping as well as its inverse is continuous. Thus, restricting to the compact set  $\mathcal{Z}$  where the map from coefficients to roots only goes to the reals, the desired result follows. To explicitly check the continuity, note that limit of  $E^{-1}(z)$ , as  $z$  approaches  $z^*$  from inside  $\mathcal{Z}$ , always exists and is equal to  $E^{-1}(z^*)$  since it does so in the complex plane. ■

With the lemma developed above we are in a position to tackle the main theorem.

**Theorem 7** Let  $f : [0, 1]^M \rightarrow \mathbb{R}$  be a permutation invariant continuous function iff it has the representation

$$f(x_1, \dots, x_M) = \rho \left( \sum_{m=1}^M \phi(x_m) \right) \quad (18)$$

for some continuous outer and inner function  $\rho : \mathbb{R}^{M+1} \rightarrow \mathbb{R}$  and  $\phi : \mathbb{R} \rightarrow \mathbb{R}^{M+1}$  respectively. The inner function  $\phi$  is independent of the function  $f$ .

**Proof.** The sufficiency follows by observing that the function  $\rho \left( \sum_{m=1}^M \phi(x_m) \right)$  satisfies the permutation invariance condition.

To prove necessity, *i.e.* that all permutation invariant continuous functions over the compact set can be expressed in this manner, we divide the proof into two parts, with outline in Fig. 4. We begin

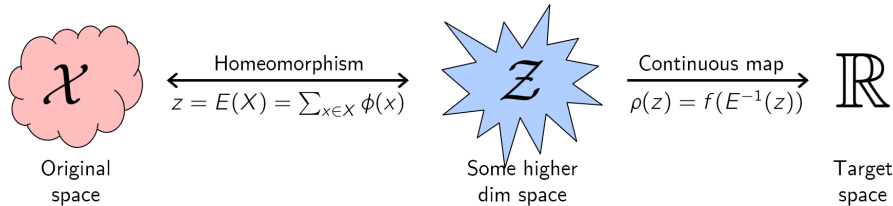

Figure 4: Outline of the proof strategy for Theorem 2.1. The proof consists of two parts. First, we desire to show that we can find unique embeddings for each possible input, *i.e.* we show that there exists a homeomorphism  $E$  of the form  $E(X) = \sum_{x \in X} \phi(x)$  between original domain and some higher dimensional space  $\mathcal{Z}$ . The second part of the proof consists of showing we can map the embedding to desired target value, *i.e.* to show the existence of the continuous map  $\rho$  between  $\mathcal{Z}$  and original target space such that  $f(X) = \rho(\sum_{x \in X} \phi(x))$ .

by looking at the continuous embedding formed by the inner function:  $E(X) = \sum_{m=1}^M \phi(x_m)$ . Consider  $\phi : \mathbb{R} \rightarrow \mathbb{R}^{M+1}$  defined as  $\phi(x) = [1, x, x^2, \dots, x^M]$ . Now as  $E$  is a polynomial, the image of  $[0, 1]^M$  in  $\mathbb{R}^{M+1}$  under  $E$  is a compact set as well, denote it by  $\mathcal{Z}$ . Then by definition, the embedding  $E : [0, 1]^M \rightarrow \mathcal{Z}$  is surjective. Using Lemma 4 and 6, we know that upon restricting the permutations, *i.e.* replacing  $[0, 1]^M$  with  $\mathcal{X} = \{(x_1, \dots, x_M) \in [0, 1]^M : x_1 \leq x_2 \leq \dots \leq x_M\}$ , the embedding  $E : \mathcal{X} \rightarrow \mathcal{Z}$  is injective with a continuous inverse. Therefore, combining these observation we get that  $E$  is a homeomorphism between  $\mathcal{X}$  and  $\mathcal{Z}$ . Now it remains to show that we can map the embedding to desired target value, *i.e.* to show the existence of the continuous map  $\rho : \mathcal{Z} \rightarrow \mathbb{R}$  such that  $\rho(E(X)) = f(X)$ . In particular consider the map  $\rho(z) = f(E^{-1}(z))$ . The continuity of  $\rho$  follows directly from the fact that composition of continuous functions is continuous. Therefore we can always find continuous functions  $\phi$  and  $\rho$  to express any permutation invariant function  $f$  as  $\rho\left(\sum_{m=1}^M \phi(x_m)\right)$ . ■

A very similar but more general results holds in case of any continuous function (not necessarily permutation invariant). The result is known as Kolmogorov-Arnold representation theorem [47, Chap. 17] which we state below:

**Theorem 8 (Kolmogorov–Arnold representation)** *Let  $f : [0, 1]^M \rightarrow \mathbb{R}$  be an arbitrary multivariate continuous function iff it has the representation*

$$f(x_1, \dots, x_M) = \rho\left(\sum_{m=1}^M \lambda_m \phi(x_m)\right) \quad (19)$$

*with continuous outer and inner functions  $\rho : \mathbb{R}^{2M+1} \rightarrow \mathbb{R}$  and  $\phi : \mathbb{R} \rightarrow \mathbb{R}^{2M+1}$ . The inner function  $\phi$  is independent of the function  $f$ .*

This theorem essentially states a representation theorem for any multivariate continuous function. Their representation is very similar to the one we are proved, except for the dependence of inner transformation on the co-ordinate through  $\lambda_m$ . Thus it is reassuring that behind all the beautiful mathematics something intuitive is happening. If the function is permutation invariant, this dependence on co-ordinate of the inner transformation gets dropped!

Further we can show that arbitrary approximator having the same form can be obtained for continuous permutation-invariant functions.

**Theorem 9** *Assume the elements are from a compact set in  $\mathbb{R}^d$ , *i.e.* possibly uncountable, and the set size is fixed to  $M$ . Then any continuous function operating on a set  $X$ , *i.e.*  $f : \mathbb{R}^{d \times M} \rightarrow \mathbb{R}$  which is permutation invariant to the elements in  $X$  can be approximated arbitrarily close in the form of  $\rho\left(\sum_{x \in X} \phi(x)\right)$ , for suitable transformations  $\phi$  and  $\rho$ .*

**Proof.** Permutation invariance follows from the fact that sets have no particular order, hence any function on a set must not exploit any particular order either. The sufficiency follows by observing that the function  $\rho\left(\sum_{x \in X} \phi(x)\right)$  satisfies the permutation invariance condition.

To prove necessity, *i.e.* that all continuous functions over the compact set can be approximated arbitrarily close in this manner, we begin noting that polynomials are universal approximators by Stone–Weierstrass theorem [48, sec. 5.7]. In this case the Chevalley–Shephard–Todd (CST) theorem [49, chap. V, theorem 4], or more precisely, its special case, the Fundamental Theorem of Symmetric Functions states that symmetric polynomials are given by a polynomial of homogeneous symmetric monomials. The latter are given by the sum over monomial terms, which is all that we need since it implies that all symmetric polynomials can be written in the form required by the theorem. ■

Finally, we still conjecture that even in case of sets of all sizes, *i.e.* when the domain is  $2^{[0,1]}$ , a representation of the form  $f(X) = \rho\left(\sum_{x \in X} \phi(x)\right)$  should exist for all “continuous” permutation invariant functions for some suitable transformations  $\rho$  and  $\phi$ . However, in this case even what a “continuous” function means is not clear as the space  $2^{[0,1]}$  does not have any natural topology. As a future work, we want to study further by defining various topologies, like using Fréchet distance as used in [46] or MMD distance. Our preliminary findings in this regards hints that using MMD distance if the representation is allowed to be in  $\ell^2$ , instead of being finite dimensional, then the conjecture seems to be provable. Thus, clearly this direction needs further exploration. We end this section by providing some examples:

**Examples:**

- $x_1x_2(x_1 + x_2 + 3)$ , Consider  $\phi(x) = [x, x^2, x^3]$  and  $\rho([u, v, w]) = uv - w + 3(u^2 - v)/2$ , then  $\rho(\phi(x_1) + \phi(x_2))$  is the desired function.
- $x_1x_2x_3 + x_1 + x_2 + x_3$ , Consider  $\phi(x) = [x, x^2, x^3]$  and  $\rho([u, v, w]) = (u^3 + 2w - 3uv)/6 + u$ , then  $\rho(\phi(x_1) + \phi(x_2) + \phi(x_3))$  is the desired function.
- $1/n(x_1 + x_2 + x_3 + \dots + x_m)$ , Consider  $\phi(x) = [1, x]$  and  $\rho([u, v]) = v/u$ , then  $\rho(\phi(x_1) + \phi(x_2) + \phi(x_3) + \dots + \phi(x_m))$  is the desired function.
- $\max\{x_1, x_2, x_3, \dots, x_m\}$ , Consider  $\phi(x) = [e^{\alpha x}, xe^{\alpha x}]$  and  $\rho([u, v]) = v/u$ , then as  $\alpha \rightarrow \infty$ , then we have  $\rho(\phi(x_1) + \phi(x_2) + \phi(x_3) + \dots + \phi(x_m))$  approaching the desired function.
- Second largest among  $\{x_1, x_2, x_3, \dots, x_m\}$ , Consider  $\phi(x) = [e^{\alpha x}, xe^{\alpha x}]$  and  $\rho([u, v]) = (v - (v/u)e^{\alpha v/u})/(u - e^{\alpha v/u})$ , then as  $\alpha \rightarrow \infty$ , we have  $\rho(\phi(x_1) + \phi(x_2) + \phi(x_3) + \dots + \phi(x_m))$  approaching the desired function.

## B Proof of Lemma 3

Our goal is to design neural network layers that are equivariant to permutations of elements in the input  $\mathbf{x}$ . The function  $\mathbf{f} : \mathcal{X}^M \rightarrow \mathcal{Y}^M$  is **equivariant** to the permutation of its inputs iff

$$\mathbf{f}(\pi\mathbf{x}) = \pi\mathbf{f}(\mathbf{x}) \quad \forall \pi \in \mathcal{S}_M$$

where the symmetric group  $\mathcal{S}_M$  is the set of all permutation of indices  $1, \dots, M$ .

Consider the standard neural network layer

$$\mathbf{f}_\Theta(\mathbf{x}) \doteq \sigma(\Theta\mathbf{x}) \quad \Theta \in \mathbb{R}^{M \times M} \quad (20)$$

where  $\Theta$  is the weight vector and  $\sigma : \mathbb{R} \rightarrow \mathbb{R}$  is a nonlinearity such as sigmoid function. The following lemma states the necessary and sufficient conditions for permutation-equivariance in this type of function.

**Lemma 3** *The function  $\mathbf{f}_\Theta : \mathbb{R}^M \rightarrow \mathbb{R}^M$  as defined in (20) is permutation equivariant if and only if all the off-diagonal elements of  $\Theta$  are tied together and all the diagonal elements are equal as well. That is,*

$$\Theta = \lambda \mathbf{I} + \gamma (\mathbf{1}\mathbf{1}^\top) \quad \lambda, \gamma \in \mathbb{R} \quad \mathbf{1} = [1, \dots, 1]^\top \in \mathbb{R}^M$$

where  $\mathbf{I} \in \mathbb{R}^{M \times M}$  is the identity matrix.

**Proof.**

From definition of permutation equivariance  $\mathbf{f}_\Theta(\pi\mathbf{x}) = \pi\mathbf{f}_\Theta(\mathbf{x})$  and definition of  $\mathbf{f}$  in (20), the condition becomes  $\sigma(\Theta\pi\mathbf{x}) = \pi\sigma(\Theta\mathbf{x})$ , which (assuming sigmoid is a bijection) is equivalent to  $\Theta\pi = \pi\Theta$ . Therefore we need to show that the necessary and sufficient conditions for the matrix  $\Theta \in \mathbb{R}^{M \times M}$  to commute with all permutation matrices  $\pi \in \mathcal{S}_M$  is given by this proposition. We prove this in both directions:

- To see why  $\Theta = \lambda \mathbf{I} + \gamma (\mathbf{1}\mathbf{1}^\top)$  commutes with any permutation matrix, first note that commutativity is linear – that is

$$\Theta_1\pi = \pi\Theta_1 \wedge \Theta_2\pi = \pi\Theta_2 \quad \Rightarrow \quad (a\Theta_1 + b\Theta_2)\pi = \pi(a\Theta_1 + b\Theta_2).$$

Since both Identity matrix  $\mathbf{I}$ , and constant matrix  $\mathbf{1}\mathbf{1}^\top$ , commute with any permutation matrix, so does their linear combination  $\Theta = \lambda \mathbf{I} + \gamma (\mathbf{1}\mathbf{1}^\top)$ .

- We need to show that in a matrix  $\Theta$  that commutes with “all” permutation matrices
  - *All diagonal elements are identical:* Let  $\pi_{k,l}$  for  $1 \leq k, l \leq M, k \neq l$ , be a transposition (i.e. a permutation that only swaps two elements). The inverse permutation matrix of  $\pi_{k,l}$  is the permutation matrix of  $\pi_{l,k} = \pi_{k,l}^\top$ . We see that commutativity of  $\Theta$  with the transposition  $\pi_{k,l}$  implies that  $\Theta_{k,k} = \Theta_{l,l}$ :

$$\pi_{k,l}\Theta = \Theta\pi_{k,l} \Rightarrow \pi_{k,l}\Theta\pi_{l,k} = \Theta \Rightarrow (\pi_{k,l}\Theta\pi_{l,k})_{l,l} = \Theta_{l,l} \Rightarrow \Theta_{k,k} = \Theta_{l,l}$$

Therefore,  $\pi$  and  $\Theta$  commute for any permutation  $\pi$ , they also commute for any transposition  $\pi_{k,l}$  and therefore  $\Theta_{i,i} = \lambda \forall i$ .

- *All off-diagonal elements are identical:* We show that since  $\Theta$  commutes with any product of transpositions, any choice two off-diagonal elements should be identical. Let  $(i, j)$  and  $(i', j')$  be the index of two off-diagonal elements (i.e.  $i \neq j$  and  $i' \neq j'$ ). Moreover for now assume  $i \neq i'$  and  $j \neq j'$ . Application of the transposition  $\pi_{i,i'}$  to  $\Theta$ , swaps the rows  $i, i'$  in  $\Theta$ . Similarly,  $\Theta\pi_{j,j'}$  switches the  $j^{th}$  column with  $j'^{th}$  column. From commutativity property of  $\Theta$  and  $\pi \in \mathcal{S}_n$  we have

$$\begin{aligned} \pi_{j',j}\pi_{i,i'}\Theta &= \Theta\pi_{j',j}\pi_{i,i'} \Rightarrow \pi_{j',j}\pi_{i,i'}\Theta(\pi_{j',j}\pi_{i,i'})^{-1} = \Theta \Rightarrow \\ \pi_{j',j}\pi_{i,i'}\Theta\pi_{i',i}\pi_{j,j'} &= \Theta \Rightarrow (\pi_{j',j}\pi_{i,i'}\Theta\pi_{i',i}\pi_{j,j'})_{i,j} = \Theta_{i,j} \Rightarrow \Theta_{i',j'} = \Theta_{i,j} \end{aligned}$$

where in the last step we used our assumptions that  $i \neq i', j \neq j', i \neq j$  and  $i' \neq j'$ . In the cases where either  $i = i'$  or  $j = j'$ , we can use the above to show that  $\Theta_{i,j} = \Theta_{i'',j''}$  and  $\Theta_{i',j'} = \Theta_{i'',j''}$ , for some  $i'' \neq i, i'$  and  $j'' \neq j, j'$ , and conclude  $\Theta_{i,j} = \Theta_{i',j'}$ . ■

## C More Details on the architecture

### C.1 Invariant model

The structure of permutation invariant functions in Theorem 2 hints at a general strategy for inference over sets of objects, which we call deep sets. Replacing  $\phi$  and  $\rho$  by universal approximators leaves matters unchanged, since, in particular,  $\phi$  and  $\rho$  can be used to approximate arbitrary polynomials. Then, it remains to learn these approximators. This yields in the following model:

- Each instance  $x_m \forall 1 \leq m \leq M$  is transformed (possibly by several layers) into some representation  $\phi(x_m)$ .
- The addition  $\sum_m \phi(x_m)$  of these representations processed using the  $\rho$  network very much in the same manner as in any deep network (e.g. fully connected layers, nonlinearities, etc).
- Optionally: If we have additional meta-information  $z$ , then the above mentioned networks could be conditioned to obtain the conditioning mapping  $\phi(x_m|z)$ .

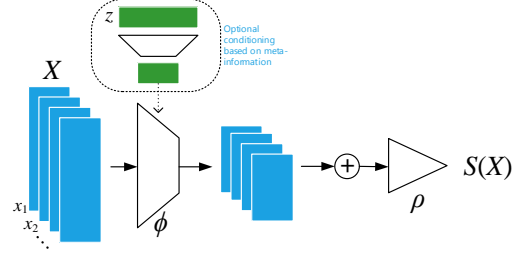

Figure 5: Architecture of DeepSets: Invariant

In other words, the key to deep sets is to add up all representations and then apply nonlinear transformations.

The overall model structure is illustrated in Fig. 7.

This architecture has a number of desirable properties in terms of universality and correctness. We assume in the following that the networks we choose are, in principle, universal approximators. That is, we assume that they can represent any functional mapping. This is a well established property (see e.g. [50] for details in the case of radial basis function networks).

What remains is to state the derivatives with regard to this novel type of layer. Assume parametrizations  $w_\rho$  and  $w_\phi$  for  $\rho$  and  $\phi$  respectively. Then we have

$$\partial_{w_\phi} \rho \left( \sum_{x' \in X} \phi(x') \right) = \rho' \left( \sum_{x' \in X} \phi(x') \right) \sum_{x' \in X} \partial_{w_\phi} \phi(x')$$

This result reinforces the common knowledge of parameter tying in deep networks when ordering is irrelevant. Our result backs this practice with theory and strengthens it by proving that it is the only way to do it.

### C.2 Equivariant model

Consider the standard neural network layer

$$f_\Theta(\mathbf{x}) = \sigma(\Theta \mathbf{x}) \quad (21)$$

where  $\Theta \in \mathbb{R}^{M \times M}$  is the weight vector and  $\sigma : \mathbb{R}^M \rightarrow \mathbb{R}^M$  is a point-wise nonlinearity such as a sigmoid function. The following lemma states the *necessary and sufficient* conditions for permutation-equivariance in this type of function.

**Lemma 3** *The function  $f_\Theta(\mathbf{x}) = \sigma(\Theta \mathbf{x})$  for  $\Theta \in \mathbb{R}^{M \times M}$  is permutation equivariant, iff all the off-diagonal elements of  $\Theta$  are tied together and all the diagonal elements are equal as well. That is,*

$$\Theta = \lambda \mathbf{I} + \gamma (\mathbf{1}\mathbf{1}^T) \quad \lambda, \gamma \in \mathbb{R} \quad \mathbf{1} = [1, \dots, 1]^T \in \mathbb{R}^M$$

where  $\mathbf{I} \in \mathbb{R}^{M \times M}$  is the identity matrix.

This function is simply a non-linearity applied to a weighted combination of i) its input  $\mathbf{I}\mathbf{x}$  and; ii) the sum of input values  $(\mathbf{1}\mathbf{1}^T)\mathbf{x}$ . Since summation does not depend on the permutation, the layer is

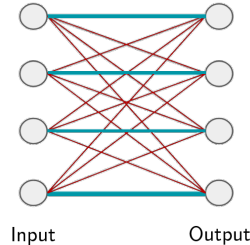

Figure 6: Illustration of permutation equivariant layer. Same color indicates weight sharing.

permutation-equivariant. Therefore we can manipulate the operations and parameters in this layer, for example to get another **variation**  $f(\mathbf{x}) = \sigma(\lambda \mathbf{I} \mathbf{x} + \gamma \text{maxpool}(\mathbf{x}) \mathbf{1})$ , where the maxpooling operation over elements of the set (similarly to summation) is commutative. In practice using this variation performs better in some applications.

So far we assumed that each instance  $x_m \in \mathbb{R}$  – *i.e.* a single input and also output channel. For **multiple input-output channels**, we may speed up the operation of the layer using matrix multiplication. For  $D/D'$  input/output channels (*i.e.*  $\mathbf{x} \in \mathbb{R}^{M \times D}$ ,  $\mathbf{y} \in \mathbb{R}^{M \times D'}$ , this layer becomes

$$f(\mathbf{x}) = \sigma(\mathbf{x} \Lambda - \mathbf{1} \mathbf{1}^T \mathbf{x} \Gamma) \quad (22)$$

where  $\Lambda, \Gamma \in \mathbb{R}^{D \times D'}$  are model parameters. As before, we can have a maxpool version as:  $f(\mathbf{x}) = \sigma(\mathbf{x} \Lambda - \mathbf{1} \text{maxpool}(\mathbf{x}) \Gamma)$  where  $\text{maxpool}(\mathbf{x}) = (\max_m \mathbf{x}) \in \mathbb{R}^{1 \times D}$  is a row-vector of maximum value of  $\mathbf{x}$  over the “set” dimension. We may further reduce the number of parameters in favor of better generalization by factoring  $\Gamma$  and  $\Lambda$  and keeping a single  $\Lambda \in \mathbb{R}^{D, D'}$  and  $\beta \in \mathbb{R}^{D'}$

$$f(\mathbf{x}) = \sigma(\beta + (\mathbf{x} - \mathbf{1} \text{maxpool}(\mathbf{x})) \Gamma) \quad (23)$$

**Stacking:** Since composition of permutation equivariant functions is also permutation equivariant, we can build deep models by stacking layers of (23). Moreover, application of any commutative pooling operation (*e.g.* max-pooling) over the set instances produces a permutation *invariant* function.

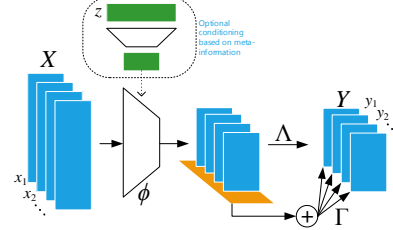

Figure 7: Architecture of DeepSets: Equivariant

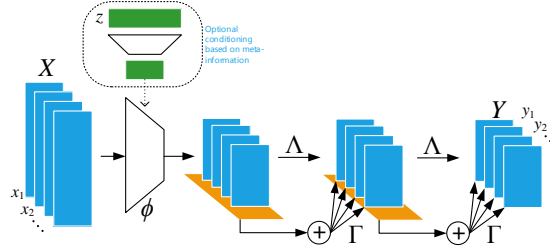

Figure 8: Using multiple permutation equivariant layers. Since permutation equivariance compose we can stack multiple such layers



## D Bayes Set [36]

Bayesian sets consider the problem of estimating the likelihood of subsets  $X$  of a ground set  $\mathcal{X}$ . In general this is achieved by an exchangeable model motivated by deFinetti's theorem concerning exchangeable distributions via

$$p(X|\alpha) = \int d\theta \left[ \prod_{m=1}^M p(x_m|\theta) \right] p(\theta|\alpha). \quad (24)$$

This allows one to perform set expansion, simply via the score

$$s(x|X) = \log \frac{p(X \cup \{x\}|\alpha)}{p(X|\alpha)p(\{x\}|\alpha)} \quad (25)$$

Note that  $s(x|X)$  is the pointwise mutual information between  $x$  and  $X$ . Moreover, due to exchangeability, it follows that regardless of the order of elements we have

$$S(X) := \sum_{m=1}^M s(x_m | \{x_{m-1}, \dots, x_1\}) = \log p(X|\alpha) - \sum_{m=1}^M \log p(\{x_m\}|\alpha) \quad (26)$$

In other words, we have a set function  $\log p(X|\alpha)$  with a modular term-dependent correction. When inferring sets it is our goal to find set completions  $\{x_{m+1}, \dots, x_M\}$  for an initial set of query terms  $\{x_1, \dots, x_m\}$  such that the aggregate set is well coherent. This is the key idea of the Bayesian Set algorithm.

### D.1 Exponential Family

In exponential families, the above approach assumes a particularly nice form whenever we have conjugate priors. Here we have

$$p(x|\theta) = \exp(\langle \phi(x), \theta \rangle - g(\theta)) \text{ and } p(\theta|\alpha, M_0) = \exp(\langle \theta, \alpha \rangle - M_0 g(\theta) - h(\alpha, M_0)). \quad (27)$$

The mapping  $\phi : x \rightarrow \mathcal{F}$  is usually referred as sufficient statistic of  $x$  which maps  $x$  into a feature space  $\mathcal{F}$ . Moreover,  $g(\theta)$  is the log-partition (or cumulant-generating) function. Finally,  $p(\theta|\alpha, M_0)$  denotes the conjugate distribution which is in itself a member of the exponential family. It has the normalization  $h(\alpha, M_0) = \int d\theta \exp(\langle \theta, \alpha \rangle - M_0 g(\theta))$ . The advantage of this is that  $s(x|X)$  and  $S(X)$  can be computed in closed form [36] via

$$s(X) = h(\alpha + \phi(X), M_0 + M) + (M-1)h(\alpha, M_0) - \sum_{m=1}^M h(\alpha + \phi(x_m), M+1) \quad (28)$$

$$s(x|X) = h(\alpha + \phi(\{x\} \cup X), M_0 + M + 1) + h(\alpha, M_0) - h(\alpha + \phi(X), M_0 + M) - h(\alpha + \phi(x), M+1) \quad (29)$$

For convenience we defined the sufficient statistic of a set to be the sum over its constituents, i.e.  $\phi(X) = \sum_m \phi(x_m)$ . It allows for very simple computation and maximization over additional elements to be added to  $X$ , since  $\phi(X)$  can be precomputed.

### D.2 Beta-Binomial Model

The model is particularly simple when dealing with the Binomial distribution and its conjugate Beta prior, since the ratio of Gamma functions allows for simple expressions. In particular, we have

$$h(\beta) = \log \Gamma(\beta^+) + \log \Gamma(\beta^-) - \Gamma(\beta). \quad (30)$$

With some slight abuse of notation we let  $\alpha = (\beta^+, \beta^-)$  and  $M_0 = \beta^+ + \beta^-$ . Setting  $\phi(1) = (1, 0)$  and  $\phi(0) = (0, 1)$  allows us to obtain  $\phi(X) = (M^+, M^-)$ , i.e.  $\phi(X)$  contains the counts of occurrences of  $x_m = 1$  and  $x_m = 0$  respectively. This leads to the following score functions

$$s(X) = \log \Gamma(\beta^+ + M^+) + \log \Gamma(\beta^- + M^-) - \log \Gamma(\beta + M) - \log \Gamma(\beta^+) - \log \Gamma(\beta^-) + \log \Gamma(\beta) - M^+ \log \frac{\beta^+}{\beta} - M^- \log \frac{\beta^-}{\beta} \quad (31)$$

$$s(x|X) = \begin{cases} \log \frac{\beta^+ + M^+}{\beta + M} - \log \frac{\beta^+}{\beta} & \text{if } x = 1 \\ \log \frac{\beta^- + M^-}{\beta + M} - \log \frac{\beta^-}{\beta} & \text{otherwise} \end{cases} \quad (32)$$

This is the model used by [36] when estimating Bayesian Sets for objects. In particular, they assume that for any given object  $x$  the vector  $\phi(x) \in \{0; 1\}^d$  is a  $d$ -dimensional binary vector, where each coordinate is drawn independently from some Beta-Binomial model. The advantage of the approach is that it can be computed very efficiently while only maintaining minimal statistics of  $X$ .

In a nutshell, the *algorithmic* operations performed in the Beta-Binomial model are as follows:

$$s(x|X) = 1^\top \left[ \sigma \left( \sum_{m=1}^M \phi(x_m) + \phi(x) + \beta \right) - \sigma(\phi(x) + \beta) \right] \quad (33)$$

In other words, we sum over statistics of the candidates  $x_m$ , add a bias term  $\beta$ , perform a *coordinate-wise* nonlinear transform over the aggregate statistic (in our case a logarithm), and finally we aggregate over the so-obtained scores, weighing each contribution equally.  $s(X)$  is expressed analogously.

### D.3 Gauss Inverse Wishart Model

Before abstracting away the probabilistic properties of the model, it is worth paying some attention to the case where we assume that  $x_i \sim \mathcal{N}(\mu, \Sigma)$  and  $(\mu, \Sigma) \sim \text{NIW}(\mu_0, \lambda, \Psi, \nu)$ , for a suitable set of conjugate parameters. While the details are (arguably) tedious, the overall structure of the model is instructive.

First note that the sufficient statistic of the data  $x \in \mathbb{R}^d$  is now given by  $\phi(x) = (x, xx^\top)$ . Secondly, note that the conjugate log-partition function  $h$  amounts to computing *determinants* of terms involving  $\sum_m x_m x_m^\top$  and moreover, nonlinear combinations of the latter with  $\sum_m x_m$ .

The *algorithmic* operations performed in the Gauss Inverse Wishart model are as follows:

$$s(x|X) = \sigma \left( \sum_{m=1}^M \phi(x_m) + \phi(x) + \beta \right) - \sigma(\phi(x) + \beta) \quad (34)$$

Here  $\sigma$  is a nontrivial convex function acting on a (matrix, vector) pair and  $\phi(x)$  is no longer a trivial map but performs a nonlinear dimension altering transformation on  $x$ . We will use this general template to fashion the Deep Sets algorithm.

## E Text Concept Set Retrieval

We consider the task of text concept set retrieval, where the objective is to retrieve words belonging to a ‘concept’ or ‘cluster’, given few words from that particular concept. For example, given the set of words  $\{tiger, lion, cheetah\}$ , we would need to retrieve other related words like *jaguar*, *puma*, *etc.*, which belong to the same concept of big cats. The model implicitly needs to reason out the concept connecting the given set and then retrieve words based on their relevance to the inferred concept. Concept set retrieval is an important due to wide range of potential applications including personalized information retrieval, tagging large amounts of unlabeled or weakly labeled datasets, *etc.* This task of concept set retrieval can be seen as a set completion task conditioned on the latent semantic concept, and therefore our DeepSets form a desirable approach.

**Dataset** To construct a large dataset containing sets of related words, we make use of Wikipedia text due to its huge vocabulary and concept coverage. First, we run topic modeling on publicly available wikipedia text with  $K$  number of topics. Specifically, we use the famous latent Dirichlet allocation [38, 39], taken out-of-the-box<sup>4</sup>. Next, we choose top  $N_T = 50$  words for each latent topic as a set giving a total of  $K$  sets of size  $N_T$ . To compare across scales, we consider three values of  $k = \{1k, 3k, 5k\}$  giving us three datasets LDA-1k, LDA-3k, and LDA-5k, with corresponding vocabulary sizes of 17k, 38k, and 61k. Few of the topics from LDA-1k are visualized in Tab. 9.

**Methods** Our DeepSets model uses a feedforward neural network (NN) to represent a query and each element of a set, *i.e.*,  $\phi(x)$  for an element  $x$  is encoded as a NN. Specifically,  $\phi(x)$  represents each word via 50-dimensional embeddings that are we learn jointly, followed by two fully connected layers of size 150, with ReLU activations. We then construct a set representation or feature, by sum pooling all the individual representations of its elements, along with that of the query. Note that this sum pooling achieves permutation invariance, a crucial property of our DeepSets (Theorem 2). Next, we input this set feature into another NN to assign a single score to the set, shown as  $\rho(\cdot)$ . We instantiate  $\rho(\cdot)$  as three fully connected layers of sizes  $\{150, 75, 1\}$  with ReLU activations. In summary, our DeepSets consists of two neural networks – (a) to extract representations for each element, and (b) to score a set after pooling representations of its elements.

**Baselines** We compare to several baselines: (a) **Random** picks a word from the vocabulary uniformly at random. (b) **Bayes Set** [36], and (c) **w2v-Near** that computes the nearest neighbors in the word2vec [40] space. Note that both Bayes Set and w2v NN are strong baselines. The former runs Bayesian inference using Beta-Binomial conjugate pair, while the latter uses the powerful 300 dimensional word2vec trained on the billion word GoogleNews corpus<sup>5</sup>. (d) **NN-max** uses a similar architecture as our DeepSets with an important difference. It uses max pooling to compute the set feature, as opposed to DeepSets which uses sum pooling. (e) **NN-max-con** uses max pooling on set elements but concatenates this pooled representation with that of query for a final set feature. (f) **NN-sum-con** is similar to NN-max-con but uses sum pooling followed by concatenation with query representation.

**Evaluation** To quantitatively evaluate, we consider the standard retrieval metrics – recall@K, median rank and mean reciprocal rank. To elaborate, recall@K measures the number of true labels that were recovered in the top K retrieved words. We use three values of  $K = \{10, 100, 1k\}$ . The other two metrics, as the names suggest, are the median and mean of reciprocals of the true label ranks, respectively. Each dataset is split into TRAIN (80%), VAL (10%) and TEST (10%). We learn models using TRAIN and evaluate on TEST, while VAL is used for hyperparameter selection and early stopping.

**Results and Observations** Tab. 3 contains the results for the text concept set retrieval on LDA-1k, LDA-3k, and LDA-5k datasets. We summarize our findings below: (a) Our /deepsets model outperforms all other approaches on LDA-3k and LDA-5k by any metric, highlighting the significance of permutation invariance property. For instance, /deepsets is better than the w2v-Near baseline by 1.5% in Recall@10 on LDA-5k. (b) On LDA-1k, neural network based models do not perform well when compared to w2v-Near. We hypothesize that this is due to small size of the dataset insufficient to train a high capacity neural network, while w2v-Near has been trained on a billion word corpus. Nevertheless, our approach comes the closest to w2v-Near amongst other approaches, and is only 0.5% lower by Recall@10.

<sup>4</sup>[github.com/dmlc/experimental-lda](https://github.com/dmlc/experimental-lda)

<sup>5</sup>[code.google.com/archive/p/word2vec/](https://code.google.com/archive/p/word2vec/)

| Topic 1  | Topic 2      | Topic 3     | Topic 4    | Topic 5     | Topic 6   |
|----------|--------------|-------------|------------|-------------|-----------|
| legend   | president    | plan        | newspaper  | round       | point     |
| airy     | vice         | proposed    | daily      | teams       | angle     |
| tale     | served       | plans       | paper      | final       | axis      |
| witch    | office       | proposal    | news       | played      | plane     |
| devil    | elected      | planning    | press      | redirect    | direction |
| giant    | secretary    | approved    | published  | won         | distance  |
| story    | presidency   | planned     | newspapers | competition | surface   |
| folklore | presidential | development | editor     | tournament  | curve     |

Figure 9: Examples from our LDA-1k datasets. Notice that each of these are latent topics of LDA and hence are semantically similar.

## F Image Tagging

We next experiment with image tagging, where the task is to retrieve all relevant tags corresponding to an image. Images usually have only a subset of relevant tags, therefore predicting other tags can help enrich information that can further be leveraged in a downstream supervised task. In our setup, we learn to predict tags by conditioning /deepsets on the image. Specifically, we train by learning to predict a partial set of tags from the image and remaining tags. At test time, we the test image is used to predict relevant tags.

**Datasets** We report results on the following three datasets:

(a) *ESPgame* [51]: Contains around 20k images spanning logos, drawings, and personal photos, collected interactively as part of a game. There are a total of 268 unique tags, with each image having 4.6 tags on average and a maximum of 15 tags.

(b) *IAPRTC-12.5* [52]: Comprises of around 20k images including pictures of different sports and actions, photographs of people, animals, cities, landscapes, and many other aspects of contemporary life. A total of 291 unique tags have been extracted from captions for the images. For the above two datasets, train/test splits are similar to those used in previous works [41, 44].

(c) *COCO-Tag*: We also construct a dataset in-house, based on MSCOCO dataset[53]. COCO is a large image dataset containing around 80k train and 40k test images, along with five caption annotations. We extract tags by first running a standard spell checker<sup>6</sup> and lemmatizing these captions. Stopwords and numbers are removed from the set of extracted tags. Each image has 15.9 tags on an average and a maximum of 46 tags. We show examples of image tags from COCO-Tag in Fig. 10. The advantages of using COCO-Tag are three fold—richer concepts, larger vocabulary and more tags per image, making this an ideal dataset to learn image tagging using /deepsets.

**Image and Word Embeddings** Our models use features extracted from Resnet, which is the state-of-the-art convolutional neural network (CNN) on ImageNet 1000 categories dataset using the publicly available 152-layer pretrained model<sup>7</sup>. To represent words, we jointly learn embeddings with the rest of /deepsets neural network for ESPgame and IAPRTC-12.5 datasets. But for COCO-Tag, we bootstrap from 300 dimensional word2vec embeddings<sup>8</sup> as the vocabulary for COCO-Tag is significantly larger than both ESPgame and IAPRTC-12.5 (13k vs 0.3k).

**Methods** The setup for DeepSets to tag images is similar to that described in Appendix E. The only difference being the conditioning on the image features, which is concatenated with the set feature obtained from pooling individual element representations. In particular,  $\phi(x)$  represents each word via 300-dimensional word2vec embeddings, followed by two fully connected layers of size 300, with ReLU activations, to construct the set representation or features. As mentioned earlier, we concatenate the image features and pass this set features into another NN to assign a single score to the set, shown as  $\rho(\cdot)$ . We instantiate  $\rho(\cdot)$  as three fully connected layers of sizes  $\{300, 150, 1\}$  with ReLU activations. The resulting feature forms the new input to a neural network used to score the set, in this case, score the relevance of a tag to the image.

**Baselines** We perform comparisons against several baselines, previously reported from [41]. Specifically, we have Least Sq., a ridge regression model, MBRM [42], JEC [43] and FastTag [41]. Note that these methods do not use deep features for images, which could lead to an unfair comparison. As there is no publicly available code for MBRM and JEC, we cannot get performances of these models with Resnet extracted features. However, we report results with deep features for FastTag and Least Sq., using code made available by the authors<sup>9</sup>.

<sup>6</sup><http://hunspell.github.io/>

<sup>7</sup>[github.com/facebook/fb.resnet.torch](https://github.com/facebook/fb.resnet.torch)

<sup>8</sup><https://code.google.com/p/word2vec/>

<sup>9</sup><http://www.cse.wustl.edu/~mchen/>

**Evaluation** For ESPgame and IAPRTC-12.5, we follow the evaluation metrics as in [44] – precision (P), recall (R), F1 score (F1) and number of tags with non-zero recall (N+). Note that these metrics are evaluate for each tag and the mean is reported. We refer to [44] for further details. For COCO-Tag, however, we use recall@K for three values of  $K = \{10, 100, 1000\}$ , along with median rank and mean reciprocal rank (see evaluation in Appendix E for metric details).

**Results and Observations** Tab. 4 contains the results of image tagging on ESPgame and IAPRTC-12.5, and Tab. 5 on COCO-Tag. Here are the key observations from Tab. 4: (a) The performance of /deepsets is comparable to the best of other approaches on all metrics but precision. (b) Our recall beats the best approach by 2% in ESPgame. On further investigation, we found that /deepsets retrieves more relevant tags, which are not present in list of ground truth tags due to a limited 5 tag annotation. Thus, this takes a toll on precision while gaining on recall, yet yielding improvement in F1. On the larger and richer COCO-Tag, we see that /deepsets approach outperforms other methods comprehensively, as expected. We show qualitative examples in Fig. 10.

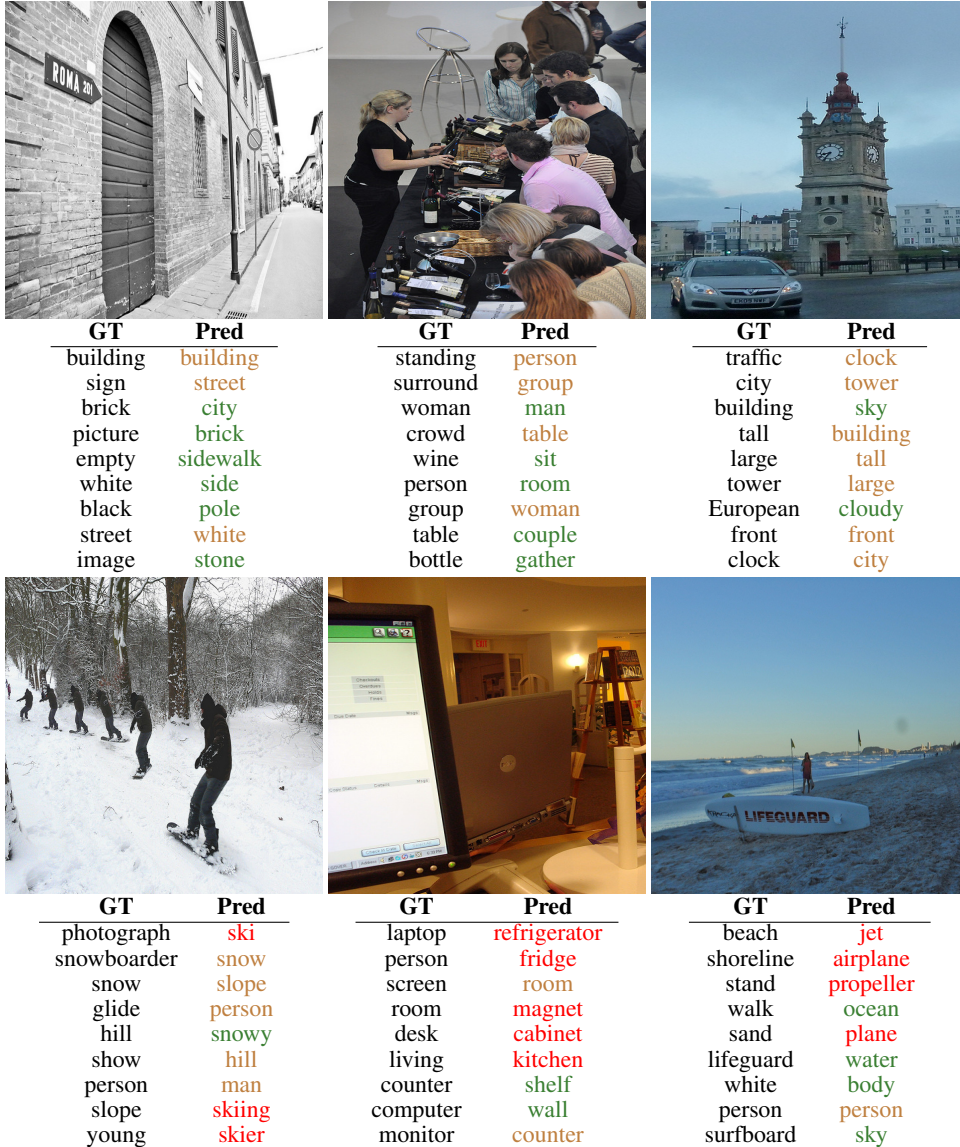

Figure 10: Qualitative examples of image tagging using /deepsets. *Top row*: Positive examples where most of the retrieved tags are present in the ground truth (brown) or are relevant but not present in the ground truth (green). *Bottom row*: Few failure cases with irrelevant/wrong tags (red). From left to right, (i) Confusion between snowboarding and skiing, (ii) Confusion between back of laptop and refrigerator due to which other tags are kitchen-related, (iii) Hallucination of airplane due to similar shape of surfboard.



## G Improved Red-shift Estimation Using Clustering Information

An important regression problem in cosmology is to estimate the red-shift of galaxies, corresponding to their age as well as their distance from us [33]. Two common types of observation for distant galaxies include a) photometric and b) spectroscopic observations, where the latter can produce more accurate red-shift estimates.

One way to estimate the red-shift from photometric observations is using a regression model [34]. We use a multi-layer Perceptron for this purpose and use the more accurate spectroscopic red-shift estimates as the ground-truth. As another baseline, we have a photometric redshift estimate that is provided by the catalogue and uses various observations (including clustering information) to estimate individual galaxy-red-shift. Our objective is to use clustering information of the galaxies to improve our red-shift prediction using the multi-layer Perceptron.

Note that the prediction for each galaxy does not change by permuting the members of the galaxy cluster. Therefore, we can treat each galaxy cluster as a “set” and use permutation-equivariant layer to estimate the individual galaxy red-shifts.

For each galaxy, we have 17 photometric features<sup>10</sup> from the redMaPPer galaxy cluster catalog [35], which contains photometric readings for 26,111 red galaxy clusters. In this task in contrast to the previous ones, sets have different cardinalities; each galaxy-cluster in this catalog has between  $\sim 20-300$  galaxies – *i.e.*  $\mathbf{x} \in \mathbb{R}^{N(c) \times 17}$ , where  $N(c)$  is the cluster-size. See Fig. 11(a) for distribution of cluster sizes. The catalog also provides accurate spectroscopic red-shift estimates for a *subset* of these galaxies as well as photometric estimates that uses clustering information. Fig. 11(b) reports the distribution of available spectroscopic red-shift estimates per cluster.

We randomly split the data into 90% training and 10% test clusters, and use the following simple architecture for semi-supervised learning. We use four permutation-equivariant layers with 128, 128, 128 and 1 output channels respectively, where the output of the last layer is used as red-shift estimate. The squared loss of the prediction for available spectroscopic red-shifts is minimized.<sup>11</sup> Fig. 11(c) shows the agreement of our estimates with spectroscopic readings on the galaxies in the test-set with spectroscopic readings. The figure also compares the photometric estimates provided by the catalogue [35], to the ground-truth. As it is customary in cosmology literature, we report the average **scatter**  $\frac{|z_{\text{spec}} - z|}{1 + z_{\text{spec}}}$ , where  $z_{\text{spec}}$  is the accurate spectroscopic measurement and  $z$  is a photometric estimate. The average scatter using **our model** is .023 compared to the scatter of .025 in the **original photometric estimates** for the redMaPPer catalog. Both of these values are averaged over all the galaxies with spectroscopic measurements in the test-set.

We repeat this experiment, replacing the permutation-equivariant layers with fully connected layers (with the same number of parameters) and only use the individual galaxies with available spectroscopic estimate for training. The resulting average scatter for **multi-layer Perceptron** is .026, demonstrating that using clustering information indeed improves photometric red-shift estimates.

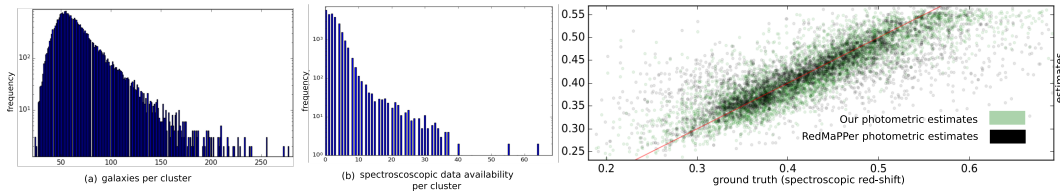

Figure 11: Application of permutation-equivariant layer to semi-supervised red-shift prediction using clustering information: (a) distribution of cluster (set) size; (b) distribution of reliable red-shift estimates per cluster; (c) prediction of red-shift on test-set (versus ground-truth) using clustering information as well as RedMaPPer photometric estimates (also using clustering information).

<sup>10</sup>We have a single measurement for each u,g,r,i and z band as well as measurement error bars, location of the galaxy in the sky, as well as the probability of each galaxy being the cluster center. We do not include the information regarding the richness estimates of the clusters from the catalog, for any of the methods, so that baseline multi-layer Perceptron is blind to the clusters.

<sup>11</sup>We use mini-batches of size 128, Adam [54], with learning rate of .001,  $\beta_1 = .9$  and  $\beta_2 = .999$ . All layers except for the last layer use Tanh units and simultaneous dropout with 50% dropout rate.

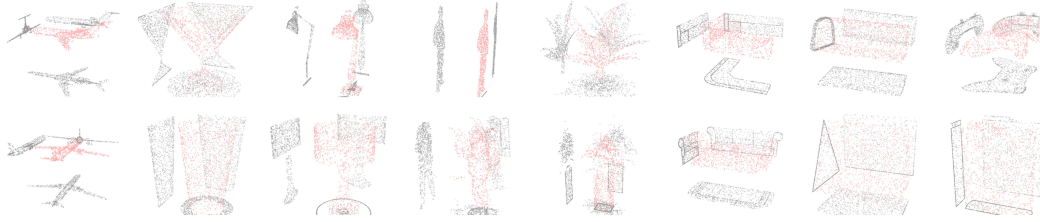

Figure 12: Examples for 8 out of 40 object classes (column) in the ModelNet40. Each point-cloud is produced by sampling 1000 particles from the mesh representation of the original ModelNet40 instances. Two point-clouds in the same column are from the same class. The projection of particles into xy, zy and xz planes are added for better visualization.

## H Point Cloud Classification

Tab. 6 presents a more detailed result on classification performance, using different techniques. Fig. 12 shows examples of the dataset used for training. Fig. 13 shows the features learned by the first and second layer of our deep model. Here, we review the details of architectures used in the experiments.

**DeepSets** We use a network comprising of 3 permutation-equivariant layers with 256 channels followed by max-pooling over the set structure. The resulting vector representation of the set is then fed to a fully connected layer with 256 units followed by a 40-way softmax unit. We use Tanh activation at all layers and dropout on the layers after set-max-pooling (*i.e.* two dropout operations) with 50% dropout rate. Applying dropout to permutation-equivariant layers for point-cloud data deteriorated the performance. We observed that using different types of permutation-equivariant layers (see Appendix C) and as few as 64 channels for set layers changes the result by less than 5% in classification accuracy.

For the setting with 5000 particles, we increase the number of units to 512 in all layers and randomly rotate the input around the  $z$ -axis. We also randomly scale the point-cloud by  $s \sim \mathcal{U}(.8, 1./8)$ . For this setting only, we use Adamax [54] instead of Adam and reduce learning rate from .001 to .0005.

**Graph convolution.** For each point-cloud instance with 1000 particles, we build a sparse K-nearest neighbor graph and use the three point coordinates as input features. We normalized all graphs at the preprocessing step. For direct comparison with set layer, we use the exact architecture of 3 graph-convolution layer followed by set-pooling (global graph pooling) and dense layer with 256 units. We use exponential linear activation function instead of Tanh as it performs better for graphs. Due to over-fitting, we use a heavy dropout of 50% after graph-convolution and dense layers. Similar to dropout for sets, all the randomly selected features are simultaneously dropped across the graph nodes. We use a mini-batch size of 64 and Adam for optimization where the learning rate is .001 (the same as that of permutation-equivariant counter-part).

Despite our efficient sparse implementation using Tensorflow, graph-convolution is significantly slower than the set layer. This prevented a thorough search for hyper-parameters and it is quite possible that better hyper-parameter tuning would improve the results that we report here.

Table 6: Classification accuracy and the (size of) representation used by different methods on the ModelNet40 dataset.

| model                                   | instance size                     | representation                                   | accuracy     |
|-----------------------------------------|-----------------------------------|--------------------------------------------------|--------------|
| <b>DeepSets + transformation (ours)</b> | <b>5000 <math>\times</math> 3</b> | point-cloud                                      | 90 $\pm$ .3% |
| <b>DeepSets (ours)</b>                  | <b>1000 <math>\times</math> 3</b> | point-cloud                                      | 87 $\pm$ 1%  |
| <b>Deep-Sets w. pooling only (ours)</b> | <b>1000 <math>\times</math> 3</b> | point-cloud                                      | 83 $\pm$ 1%  |
| <b>DeepSets (ours)</b>                  | <b>100 <math>\times</math> 3</b>  | point-cloud                                      | 82 $\pm$ 2%  |
| KNN graph-convolution (ours)            | 1000 $\times$ (3 + 8)             | directed 8-regular graph                         | 58 $\pm$ 2%  |
| 3DShapeNets [25]                        | 30 <sup>3</sup>                   | voxels (using convolutional deep belief net)     | 77%          |
| DeepPano [20]                           | 64 $\times$ 160                   | panoramic image (2D CNN + angle-pooling)         | 77.64%       |
| VoxNet [26]                             | 32 <sup>3</sup>                   | voxels (voxels from point-cloud + 3D CNN)        | 83.10%       |
| MVCNN [21]                              | 164 $\times$ 164 $\times$ 12      | multi-view images (2D CNN + view-pooling)        | 90.1%        |
| VRN Ensemble [27]                       | 32 <sup>3</sup>                   | voxels (3D CNN, variational autoencoder)         | 95.54%       |
| 3D GAN [28]                             | 64 <sup>3</sup>                   | voxels (3D CNN, generative adversarial training) | 83.3%        |

Tab. 6 compares our method against the competition.<sup>12</sup> Note that we achieve our best accuracy using  $5000 \times 3$  dimensional representation of each object, which is much smaller than most other methods. All other techniques use either voxelization or multiple view of the 3D object for classification. Interestingly, variations of view/angle-pooling, as in [20, 21], can be interpreted as set-pooling where the class-label is invariant to permutation of different views. The results also shows that using fully-connected layers with set-pooling alone (without max-normalization over the set) works relatively well.

We see that reducing the number of particles to only 100, still produces comparatively good results. Using graph-convolution is computationally more challenging and produces inferior results in this setting. The results using 5000 particles is also invariant to small changes in scale and rotation around the  $z$ -axis.

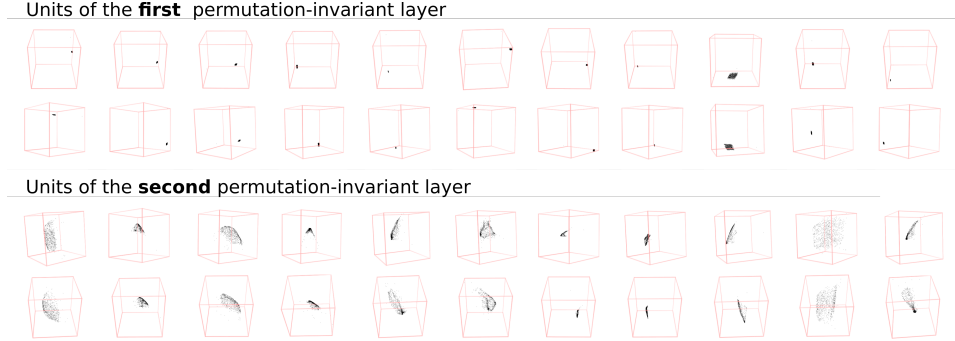

Figure 13: Each box is the particle-cloud maximizing the activation of a unit at the first (**top**) and second (**bottom**) permutation-equivariant layers of our model. Two images of the same column are two different views of the same point-cloud.

**Features.** To visualize the features learned by the set layers, we used Adamax [54] to locate 1000 particle coordinates maximizing the activation of each unit.<sup>13</sup> Activating the tanh units beyond the second layer proved to be difficult. 13 shows the particle-cloud-features learned at the first and second layers of our deep network. We observed that the first layer learns simple localized (often cubic) point-clouds at different  $(x, y, z)$  locations, while the second layer learns more complex surfaces with different scales and orientations.

## I Set Anomaly Detection

Our model has 9 convolution layers with  $3 \times 3$  receptive fields. The model has convolution layers with 32, 32, 64 feature-maps followed by max-pooling followed by 2D convolution layers with 64, 64, 128 feature-maps followed by another max-pooling layer. The final set of convolution layers have 128, 128, 256 feature-maps, followed by a max-pooling layer with pool-size of 5 that reduces the output dimension to  $\text{batch-size} \times M \times 256$ , where the set-size  $M = 16$ . This is then forwarded to three permutation-equivariant layers with 256, 128 and 1 output channels. The output of final layer is fed to the Softmax, to identify the outlier. We use exponential linear units [55], drop out with 20% dropout rate at convolutional layers and 50% dropout rate at the first two set layers. When applied to set layers, the selected feature (channel) is simultaneously dropped in all the set members of that particular set. We use Adam [54] for optimization and use batch-normalization only in the convolutional layers. We use mini-batches of 8 sets, for a total of 128 images per batch.

<sup>12</sup>The error-bar on our results is due to variations depending on the choice of particles during test time and it is estimated over three trials.

<sup>13</sup>We started from uniformly distributed set of particles and used a learning rate of .01 for Adamax, with first and second order moment of .1 and .9 respectively. We optimized the input in  $10^5$  iterations. The results of Fig. 13 are limited to instances where tanh units were successfully activated. Since the input at the first layer of our deep network is normalized to have a zero mean and unit standard deviation, we do not need to constrain the input while maximizing unit's activation.



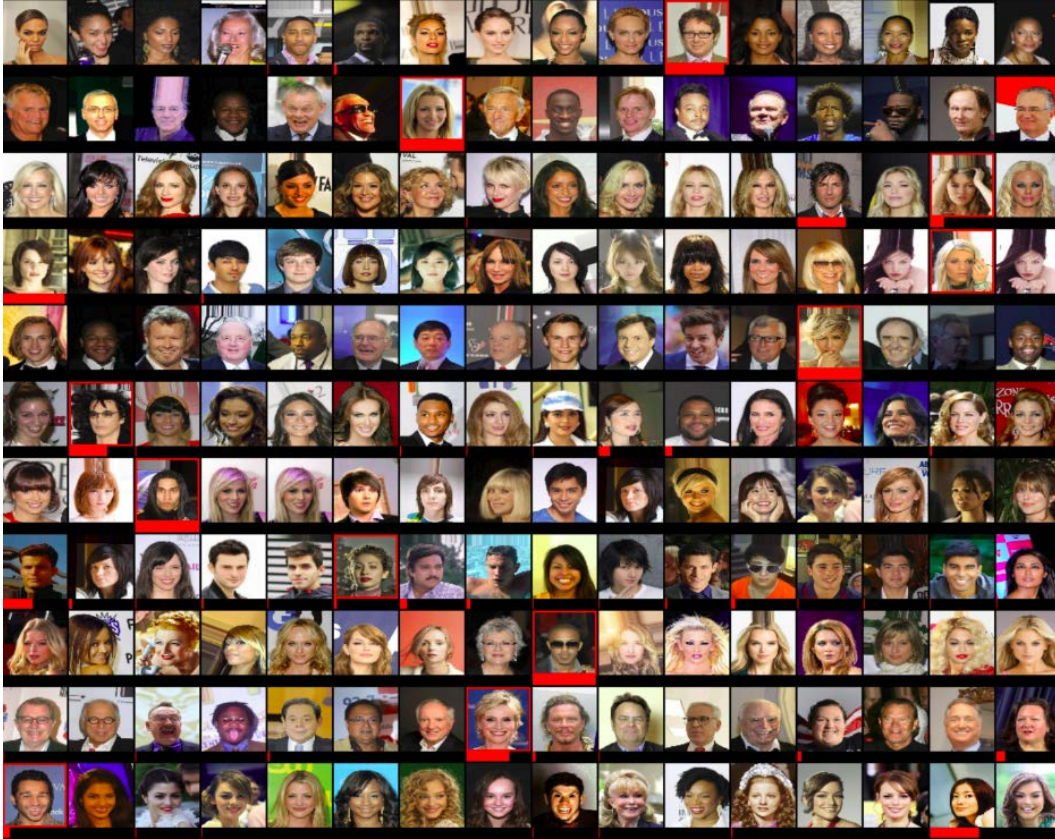

Figure 14: Each row shows a set, constructed from CelebA dataset, such that all set members except for an outlier, share at least two attributes (on the right). The outlier is identified with a red frame. The model is trained by observing examples of sets and their anomalous members, *without access to the attributes*. The probability assigned to each member by the outlier detection network is visualized using a red bar at the bottom of each image.

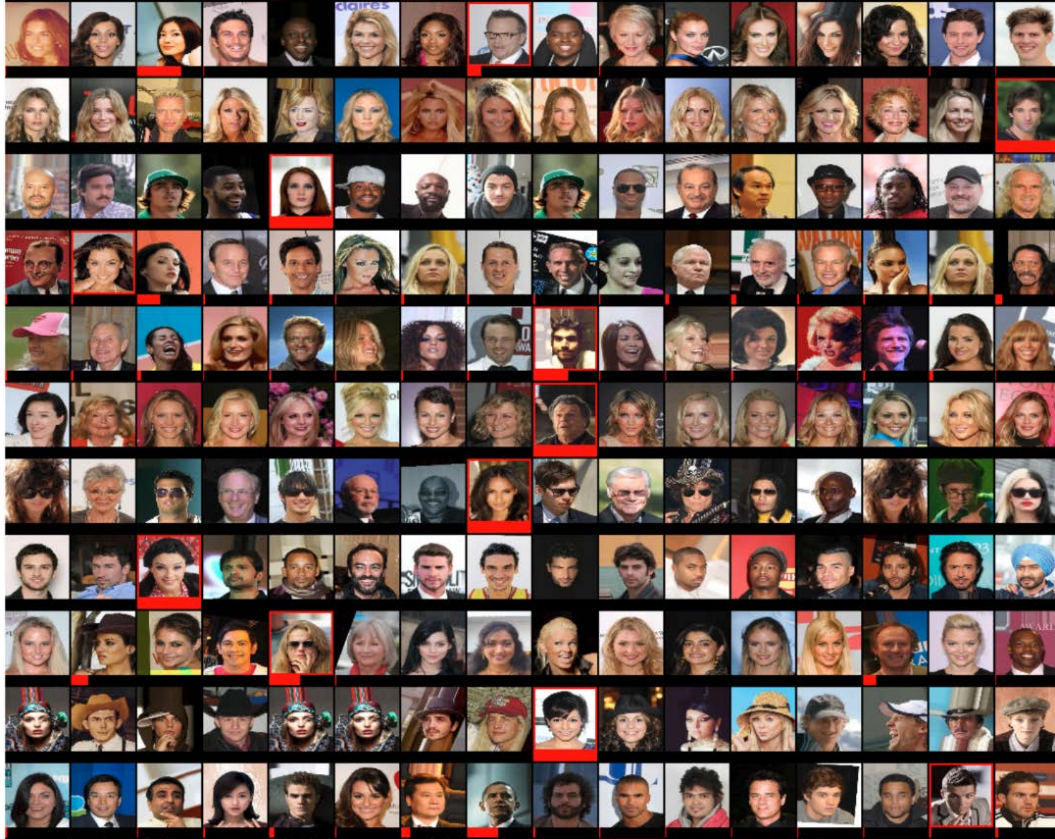

Figure 15: Each row of the images shows a set, constructed from CelebA dataset images, such that all set members except for an outlier, share at least two attributes. The outlier is identified with a red frame. The model is trained by observing examples of sets and their anomalous members and *without access to the attributes*. The probability assigned to each member by the outlier detection network is visualized using a red bar at the bottom of each image. The probabilities in each row sum to one.

## References

- [1] B. Poczos, A. Rinaldo, A. Singh, and L. Wasserman. Distribution-free distribution regression. In *International Conference on AI and Statistics (AISTATS)*, JMLR Workshop and Conference Proceedings, 2013. pages 1
- [2] I. Jung, M. Berges, J. Garrett, and B. Poczos. Exploration and evaluation of ar, mpca and kl anomaly detection techniques to embankment dam piezometer data. *Advanced Engineering Informatics*, 2015. pages 1
- [3] M. Ntampaka, H. Trac, D. Sutherland, S. Fromenteau, B. Poczos, and J. Schneider. Dynamical mass measurements of contaminated galaxy clusters using machine learning. *The Astrophysical Journal*, 2016. URL <http://arxiv.org/abs/1509.05409>. pages 1
- [4] M. Ravanbakhsh, J. Oliva, S. Fromenteau, L. Price, S. Ho, J. Schneider, and B. Poczos. Estimating cosmological parameters from the dark matter distribution. In *International Conference on Machine Learning (ICML)*, 2016. pages 1
- [5] J. Oliva, B. Poczos, and J. Schneider. Distribution to distribution regression. In *International Conference on Machine Learning (ICML)*, 2013. pages 1
- [6] Z. Szabo, B. Sriperumbudur, B. Poczos, and A. Gretton. Learning theory for distribution regression. *Journal of Machine Learning Research*, 2016. pages
- [7] K. Muandet, D. Balduzzi, and B. Schoelkopf. Domain generalization via invariant feature representation. In *In Proceeding of the 30th International Conference on Machine Learning (ICML 2013)*, 2013. pages
- [8] K. Muandet, K. Fukumizu, F. Dinuzzo, and B. Schoelkopf. Learning from distributions via support measure machines. In *In Proceeding of the 26th Annual Conference on Neural Information Processing Systems (NIPS 2012)*, 2012. pages 1, 3
- [9] Felix A. Faber, Alexander Lindmaa, O. Anatole von Lilienfeld, and Rickard Armiento. Machine learning energies of 2 million elpasolite ( $abC_2D_6$ ) crystals. *Phys. Rev. Lett.*, 117:135502, Sep 2016. doi: 10.1103/PhysRevLett.117.135502. pages 1
- [10] B. Poczos, L. Xiong, D. Sutherland, and J. Schneider. Support distribution machines, 2012. URL <http://arxiv.org/abs/1202.0302>. pages 3, 4
- [11] A. Anandkumar, R. Ge, D. Hsu, S. M. Kakade, and M. Telgarsky. Tensor decompositions for learning latent variable models. *arXiv preprint arXiv:1210.7559*, 2012. pages 3
- [12] Robert Gens and Pedro M Domingos. Deep symmetry networks. In *Advances in neural information processing systems*, pages 2537–2545, 2014. pages 3
- [13] Taco S Cohen and Max Welling. Group equivariant convolutional networks. *arXiv preprint arXiv:1602.07576*, 2016. pages
- [14] Siamak Ravanbakhsh, Jeff Schneider, and Barnabas Poczos. Equivariance through parameter-sharing. *arXiv preprint arXiv:1702.08389*, 2017. pages 3
- [15] Xu Chen, Xiuyuan Cheng, and Stéphane Mallat. Unsupervised deep haar scattering on graphs. In *Advances in Neural Information Processing Systems*, pages 1709–1717, 2014. pages 3
- [16] Michael B Chang, Tomer Ullman, Antonio Torralba, and Joshua B Tenenbaum. A compositional object-based approach to learning physical dynamics. *arXiv preprint arXiv:1612.00341*, 2016. pages 3
- [17] Nicholas Guttenberg, Nathaniel Virgo, Olaf Witkowski, Hidetoshi Aoki, and Ryota Kanai. Permutation-equivariant neural networks applied to dynamics prediction. *arXiv preprint arXiv:1612.04530*, 2016. pages 3
- [18] Oriol Vinyals, Samy Bengio, and Manjunath Kudlur. Order matters: Sequence to sequence for sets. *arXiv preprint arXiv:1511.06391*, 2015. pages 3
- [19] David Lopez-Paz, Robert Nishihara, Soumith Chintala, Bernhard Schölkopf, and Léon Bottou. Discovering causal signals in images. *arXiv preprint arXiv:1605.08179*, 2016. pages 3



- [20] Baoguang Shi, Song Bai, Zhichao Zhou, and Xiang Bai. Deeppano: Deep panoramic representation for 3-d shape recognition. *IEEE Signal Processing Letters*, 22(12):2339–2343, 2015. pages 3, 26, 27
- [21] Hang Su, Subhansu Maji, Evangelos Kalogerakis, and Erik Learned-Miller. Multi-view convolutional neural networks for 3d shape recognition. In *Proceedings of the IEEE International Conference on Computer Vision*, pages 945–953, 2015. pages 3, 5, 26, 27
- [22] Jason S Hartford, James R Wright, and Kevin Leyton-Brown. Deep learning for predicting human strategic behavior. In *Advances in Neural Information Processing Systems*, pages 2424–2432, 2016. pages 3
- [23] Sainbayar Sukhbaatar, Rob Fergus, et al. Learning multiagent communication with backpropagation. In *Neural Information Processing Systems*, pages 2244–2252, 2016. pages 3
- [24] Gaëlle Loosli, Stéphane Canu, and Léon Bottou. Training invariant support vector machines using selective sampling. In Léon Bottou, Olivier Chapelle, Dennis DeCoste, and Jason Weston, editors, *Large Scale Kernel Machines*, pages 301–320. MIT Press, Cambridge, MA., 2007. pages 5
- [25] Zhirong Wu, Shuran Song, Aditya Khosla, Fisher Yu, Linguang Zhang, Xiaoou Tang, and Jianxiong Xiao. 3d shapenets: A deep representation for volumetric shapes. In *Proceedings of the IEEE Conference on Computer Vision and Pattern Recognition*, pages 1912–1920, 2015. pages 5, 26
- [26] Daniel Maturana and Sebastian Scherer. Voxnet: A 3d convolutional neural network for real-time object recognition. In *Intelligent Robots and Systems (IROS), 2015 IEEE/RSJ International Conference on*, pages 922–928. IEEE, 2015. pages 5, 26
- [27] Andrew Brock, Theodore Lim, JM Ritchie, and Nick Weston. Generative and discriminative voxel modeling with convolutional neural networks. *arXiv preprint arXiv:1608.04236*, 2016. pages 5, 26
- [28] Jiajun Wu, Chengkai Zhang, Tianfan Xue, William T Freeman, and Joshua B Tenenbaum. Learning a probabilistic latent space of object shapes via 3d generative-adversarial modeling. *arXiv preprint arXiv:1610.07584*, 2016. pages 5, 26
- [29] Siamak Ravanbakhsh, Junier Oliva, Sebastien Fromenteau, Layne C Price, Shirley Ho, Jeff Schneider, and Barnabás Póczos. Estimating cosmological parameters from the dark matter distribution. In *Proceedings of The 33rd International Conference on Machine Learning*, 2016. pages 5
- [30] Hong-Wei Lin, Chiew-Lan Tai, and Guo-Jin Wang. A mesh reconstruction algorithm driven by an intrinsic property of a point cloud. *Computer-Aided Design*, 36(1):1–9, 2004. pages 5
- [31] Angel X Chang, Thomas Funkhouser, Leonidas Guibas, Pat Hanrahan, Qixing Huang, Zimo Li, Silvio Savarese, Manolis Savva, Shuran Song, Hao Su, et al. Shapenet: An information-rich 3d model repository. *arXiv preprint arXiv:1512.03012*, 2015. pages 5
- [32] Radu Bogdan Rusu and Steve Cousins. 3D is here: Point Cloud Library (PCL). In *IEEE International Conference on Robotics and Automation (ICRA)*, Shanghai, China, May 9-13 2011. pages 5
- [33] James Binney and Michael Merrifield. *Galactic astronomy*. Princeton University Press, 1998. pages 5, 25
- [34] AJ Connolly, I Csabai, AS Szalay, DC Koo, RG Kron, and JA Munn. Slicing through multicolor space: Galaxy redshifts from broadband photometry. *arXiv preprint astro-ph/9508100*, 1995. pages 5, 25
- [35] Eduardo Rozo and Eli S Rykoff. redmapper ii: X-ray and sz performance benchmarks for the sdss catalog. *The Astrophysical Journal*, 783(2):80, 2014. pages 5, 25
- [36] Zoubin Ghahramani and Katherine A Heller. Bayesian sets. In *NIPS*, volume 2, pages 22–23, 2005. pages 6, 7, 20, 21, 22

- [37] B. Taskar, C. Guestrin, and D. Koller. Max-margin Markov networks. In S. Thrun, L. Saul, and B. Schölkopf, editors, *Advances in Neural Information Processing Systems 16*, pages 25–32, Cambridge, MA, 2004. MIT Press. pages 6
- [38] Jonathan K. Pritchard, Matthew Stephens, and Peter Donnelly. Inference of population structure using multilocus genotype data. *Genetics*, 155(2):945–959, 2000. ISSN 0016-6731. URL <http://www.genetics.org/content/155/2/945>. pages 6, 22
- [39] David M. Blei, Andrew Y. Ng, Michael I. Jordan, and John Lafferty. Latent dirichlet allocation. *Journal of Machine Learning Research*, 3:2003, 2003. pages 6, 22
- [40] Tomas Mikolov, Ilya Sutskever, Kai Chen, Greg S Corrado, and Jeff Dean. Distributed representations of words and phrases and their compositionality. In *Advances in neural information processing systems*, pages 3111–3119, 2013. pages 7, 22
- [41] Minmin Chen, Alice Zheng, and Kilian Weinberger. Fast image tagging. In *Proceedings of The 30th International Conference on Machine Learning*, pages 1274–1282, 2013. pages 7, 23
- [42] S. L. Feng, R. Manmatha, and V. Lavrenko. Multiple bernoulli relevance models for image and video annotation. In *Proceedings of the 2004 IEEE Computer Society Conference on Computer Vision and Pattern Recognition, CVPR’04*, pages 1002–1009, Washington, DC, USA, 2004. IEEE Computer Society. pages 7, 23
- [43] Ameesh Makadia, Vladimir Pavlovic, and Sanjiv Kumar. A new baseline for image annotation. In *Proceedings of the 10th European Conference on Computer Vision: Part III, ECCV ’08*, pages 316–329, Berlin, Heidelberg, 2008. Springer-Verlag. pages 7, 23
- [44] Matthieu Guillaumin, Thomas Mensink, Jakob Verbeek, and Cordelia Schmid. Tagprop: Discriminative metric learning in nearest neighbor models for image auto-annotation. In *Computer Vision, 2009 IEEE 12th International Conference on*, pages 309–316. IEEE, 2009. pages 7, 23, 24
- [45] Ziwei Liu, Ping Luo, Xiaogang Wang, and Xiaoou Tang. Deep learning face attributes in the wild. In *Proceedings of International Conference on Computer Vision (ICCV)*, 2015. pages 8
- [46] Branko Ćurgus and Vania Mascioni. Roots and polynomials as homeomorphic spaces. *Expositiones Mathematicae*, 24(1):81–95, 2006. pages 13, 15
- [47] Boris A Khesin and Serge L Tabachnikov. *Arnold: Swimming Against the Tide*, volume 86. American Mathematical Society, 2014. pages 15
- [48] Jerrold E Marsden and Michael J Hoffman. *Elementary classical analysis*. Macmillan, 1993. pages 15
- [49] Nicolas Bourbaki. *Eléments de mathématiques: théorie des ensembles, chapitres 1 à 4*, volume 1. Masson, 1990. pages 15
- [50] C. A. Micchelli. Interpolation of scattered data: distance matrices and conditionally positive definite functions. *Constructive Approximation*, 2:11–22, 1986. pages 18
- [51] Luis Von Ahn and Laura Dabbish. Labeling images with a computer game. In *Proceedings of the SIGCHI conference on Human factors in computing systems*, pages 319–326. ACM, 2004. pages 23
- [52] Michael Grubinger. Analysis and evaluation of visual information systems performance, 2007. URL <http://eprints.vu.edu.au/1435>. Thesis (Ph. D.)—Victoria University (Melbourne, Vic.), 2007. pages 23
- [53] Tsung-Yi Lin, Michael Maire, Serge Belongie, James Hays, Pietro Perona, Deva Ramanan, Piotr Dollár, and C Lawrence Zitnick. Microsoft coco: Common objects in context. In *European Conference on Computer Vision*, pages 740–755. Springer, 2014. pages 23
- [54] Diederik Kingma and Jimmy Ba. Adam: A method for stochastic optimization. *arXiv preprint arXiv:1412.6980*, 2014. pages 25, 26, 27
- [55] Djork-Arné Clevert, Thomas Unterthiner, and Sepp Hochreiter. Fast and accurate deep network learning by exponential linear units (elus). *arXiv preprint arXiv:1511.07289*, 2015. pages 27
